# Supplementary material
Source: PubMed Central journal article supplement (PMC3989614)
Supplement: embj0033-0181-sd4.pdf [file embj0033-0181-sd4.pdf]

## SUPPLEMENTARY TABLES

Table S2: List of siRNAs used in this study

| siRNA         | sequence (5'→3')                                                                          |
|---------------|-------------------------------------------------------------------------------------------|
| RLUC (duplex) | AAACAUGCAGAAAUGCUGdTdT<br>CAGCAUUUUCUGCAUGUUUdTdT                                         |
| FAT1pool      | GAAATCACCTACTCAATAA<br>GAACTAACATGGCTGGTTT<br>GGAAGGAATTGGAATCGTT<br>GAACTGATGCCTCGGGTTT  |
| FAT2pool      | GCACATATCAGATTAATCA<br>GAAGTTACCTATGAGTTAA<br>GTAGGGAAATCGATAATGA<br>GCTCAGATGTTTCCAAGTT  |
| FAT3pool      | CAAGTGAGCTACCATATTA<br>GTACAACACTGCACTTTGA<br>GGGAACGGGTGTCTGGATA<br>TCCAGAAAGTGGCGAGTTA  |
| FAT4pool      | GGACGCCTCTTTACTATTG<br>TAGCAGAACTTCCTATTAT<br>GCAAAGGGCGCTTGGACTA<br>GATCATCGGTGGAAACTCT  |
| CIAP1pool     | TATAGGACCTGGAGATAGG<br>CAATTGACATGTGTGCTTC<br>GAACAGAATGGCTCTCTTT<br>GAAACAAACAGTTCAAAGT  |
| C8pool        | GGACAAAGTTTACCAAATG<br>CAACGACTATGAAGAATTC<br>GAAGATAATCAACGACTAT<br>GCAAGAACCCATCAAGGAT  |
| TRAIL-R1pool  | TGACAATTCTGCTGAGATG<br>CAACAAAACCTGGACGGTTC<br>GAACATAGCCCTTTGGGAG<br>CGGCAGATTTGACAGGTGT |
| TRAIL-R2pool  | GGACAGAAGCTCACAACGA<br>TCATGTATCTAGAAGGTAA<br>ACACGATGCTGATAAAGTG<br>CAAGGTCGGTGATTGTACA  |
