# Supplementary material
Source: PubMed Central journal article supplement (PMC3989614)
Supplement: embj0033-0181-sd5.pdf [file embj0033-0181-sd5.pdf]

Table S3: List of qPCR used in this study

| Primer      | UPL probe | sequence (5'→3')            |
|-------------|-----------|-----------------------------|
| GAPDH_left  | #60       | agccacatcgctcagacac         |
| GAPDH_right | #60       | gcccaatacgaccaaattcc        |
| FAT1_left   | #33       | ccttctgacagcgactcct         |
| FAT1_right  | #33       | cagggatcaagatccaccac        |
| FAT2_left   | #24       | catgaattcaagctggatcctc      |
| FAT2_right  | #24       | ctcggctctagggcagtgagt       |
| FAT3_left   | #48       | gcagaactcatatataccatagaagca |
| FAT3_right  | #48       | cctaggaccgggttcgatctt       |
| FAT4_left   | #11       | agcacaaggcatcctagatca       |
| FAT4_right  | #11       | catgggctgctgagtagaag        |
| clAP1_left  | #85       | agaaaatgctgaccacca          |
| clAP1_right | #85       | gggtattcatcatgacagcatct     |
| clAP2_left  | #44       | ctgtccttctgctggatcct        |
| clAP2_right | #44       | aagaagctgtttcctcctttgt      |
| TNF_left    | #29       | cagccttctccttctctgat        |
| TNF_right   | #29       | gccagagggctgattagaga        |
| IL8_left    | #72       | agacagcagagcacacaagc        |
| IL8_right   | #72       | atggttccttccgggtgt          |
| MnSOD_left  | #27       | tgtgcttctcgtcttcagc         |
| MnSOD_right | #27       | gagcccagatacccaaaag         |
| ICAM1_left  | #71       | ccttctcaccgtgtactgg         |
| ICAM1_right | #71       | agcgtagggtaaggttcttgc       |
| CCL2_left   | #40       | agtctctgccccttct            |
| CCL2_right  | #40       | gtgactggggcattgattg         |
| CCL20_left  | #39       | gctgctttgatgtcagtgt         |
| CCL20_right | #39       | gcagtcaaagttgcttgctg        |

Table S4: List of oligonucleotides related to sgRNA cloning

| Gene target      | Primer          |                   | sequence (5'→3')         |
|------------------|-----------------|-------------------|--------------------------|
| <i>FAT1</i>      | FAT1_for1       | for sgRNA-cloning | CACCGACTTTACCAAGACCTTGG  |
| <i>FAT1</i>      | FAT1_rev1       | for sgRNA-cloning | AAACCCAAGGTCTTGGTAAAGTC  |
| <i>Caspase-8</i> | C8_for2         | for sgRNA-cloning | CACCGCTCTCCGAATTAATAGAC  |
| <i>Caspase-8</i> | C8_rev2         | for sgRNA-cloning | AAACGTCTATTAATTCGGAAGAGC |
|                  |                 |                   |                          |
| <i>FAT1</i>      | genomic_FATfor1 | genomic PCR       | CGCCCCAGTTCTCTTCTGTT     |
| <i>FAT1</i>      | genomic_FATrev1 | genomic PCR       | CCAGCATTTTGGCAACACCA     |
| <i>Caspase-8</i> | genomic_C8for2  | genomic PCR       | CCCCAAAATCCCTTCCCCATA    |
| <i>Caspase-8</i> | genomic_C8rev2  | genomic PCR       | CAGAAATTTGAGCCCTGCCTG    |
