# Supplementary material
Source: PubMed Central journal article supplement (PMC3989614)
Supplement: embj0033-0181-sd6.pdf [file embj0033-0181-sd6.pdf]

Table S5: List of antibodies used in this study

| <b>Antibody</b>                            | <b>Catalog Number</b> | <b>Company</b>                 |
|--------------------------------------------|-----------------------|--------------------------------|
| anti- $\beta$ -actin (mouse)               | ab6276                | Abcam                          |
| anti-BID (rabbit)                          | #2002                 | Cell Signaling Technology      |
| anti-clAP1 (rat)                           |                       | kindly provided by J.Silke     |
| anti-caspase 8 (mouse)                     | ALX-804-429           | Enzo Life Sciences             |
| anti-cleaved caspase 3 (rabbit)            | #9664                 | Cell Signaling Technology      |
| anti-FADD (mouse)                          | 610399                | BD Biosciences                 |
| anti-FAT1 (rabbit)                         | HPA023882             | Sigma                          |
| anti-FLAG-M2 (mouse)                       | F1804                 | Sigma                          |
| anti-cFLIP (mouse)                         | ALX-804-428           | Enzo Life Sciences             |
| anti-GFAP (mouse)                          | MAB360                | Dianova                        |
| anti-histone H3 (rabbit)                   | H0164                 | Sigma                          |
| anti-I $\kappa$ B $\alpha$ (rabbit)        | #9242                 | Cell Signaling Technology      |
| anti-phospho-I $\kappa$ B $\alpha$ (mouse) | #9246                 | Cell Signaling Technology      |
| anti-N-cadherin (mouse)                    | 610921                | BD Biosciences                 |
| anti-NF $\kappa$ B p65 (rabbit)            | sc-109                | Santa Cruz Biotechnology       |
| anti-PARP (mouse)                          | AM30                  | Calbiochem (Merck Biosciences) |
| anti-Survivin (rabbit)                     | #9246                 | Cell Signaling Technology      |
| anti-TRAIL-R1 (rabbit)                     | 1139                  | ProSci Incorporated            |
| anti-TRAIL-R2 (rabbit)                     | 2019                  | ProSci Incorporated            |
| anti-XIAP (rabbit)                         | #2045                 | Cell Signaling Technology      |
| HRP-conjugated anti-mouse/anti-rabbit      | NA931<br>NA934        | Amersham                       |
| HRP-conjugated anti mouse IgG2b            | SBA-1090-05           | Southern Biotechnology         |
| HRP-conjugated anti-rat                    | SBA-3030-05           | Southern Biotechnology         |
