# Supplementary material
Source: PubMed Central journal article supplement (PMC3989614)

# Source Data Supplementary Figure S2

## Supplementary Figure S2A

|   |   |   |   |   |   |   |   |                |
|---|---|---|---|---|---|---|---|----------------|
| - | + | - | + | - | + | - | + | siFAT1pool     |
| - | - | + | + | - | - | + | + | siTRAIL-R2pool |

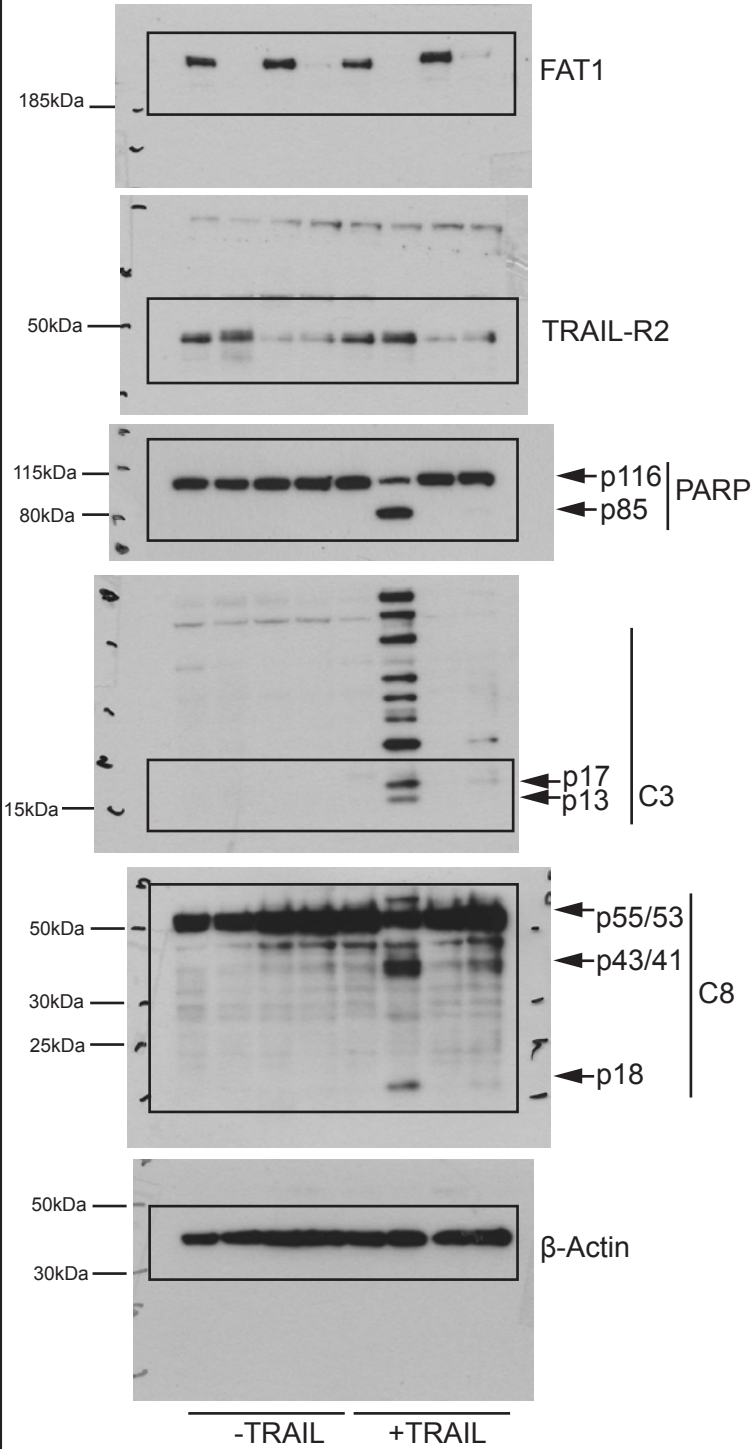

## Supplementary Figure S2B

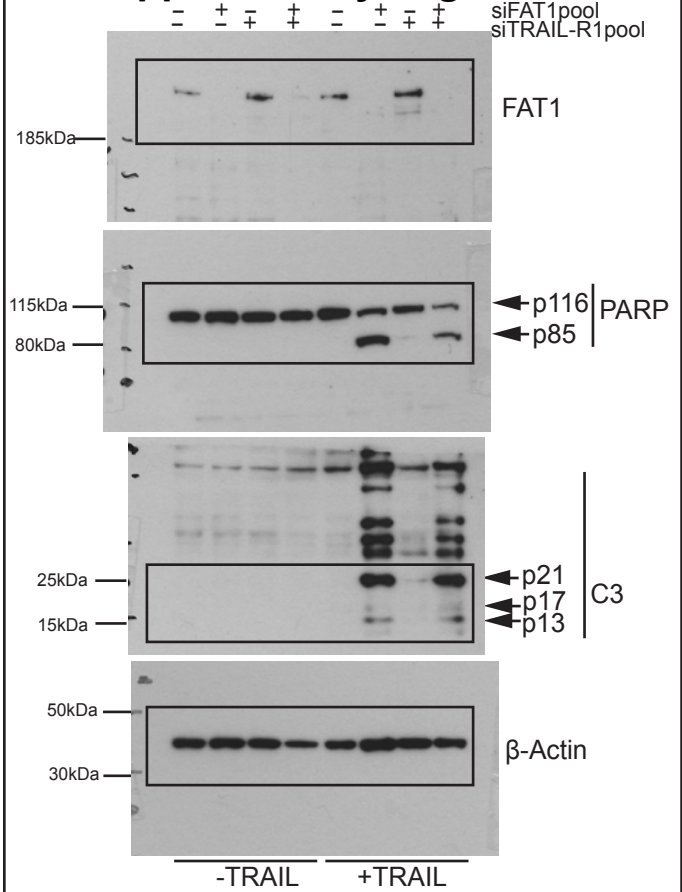

## Supplementary Figure S2D

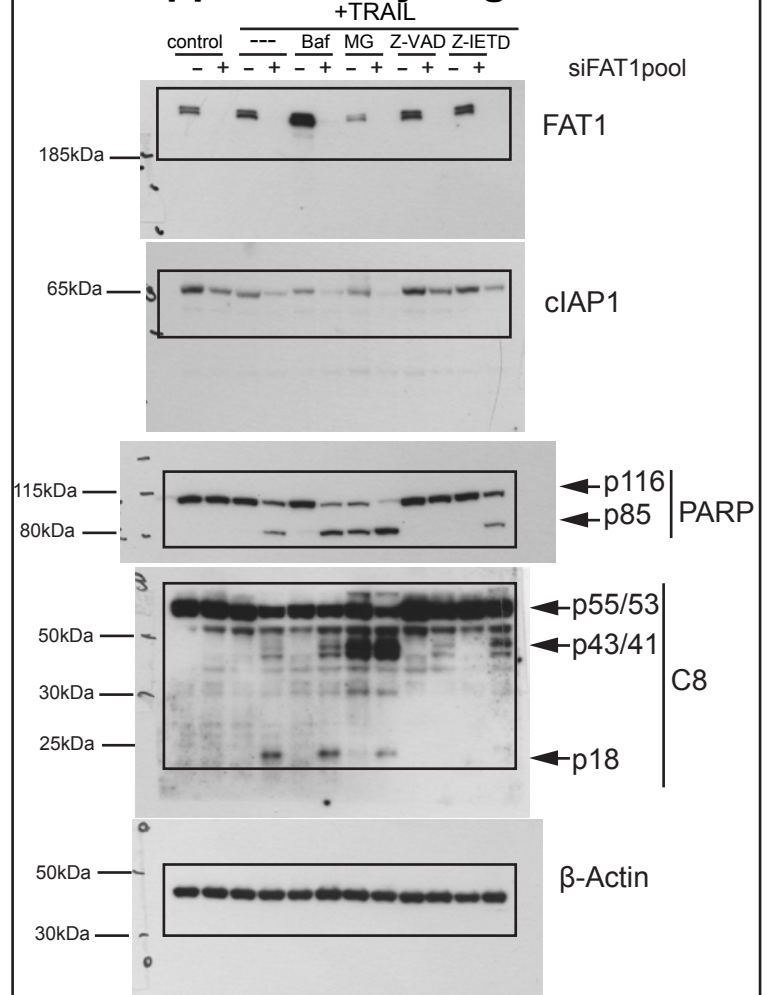

Supplement: embj0033-0181-sd8.pdf [file embj0033-0181-sd8.pdf]
