# Supplementary material
Source: PubMed Central journal article supplement (PMC3989614)

# Source Data Figure 6

## Figure 6A

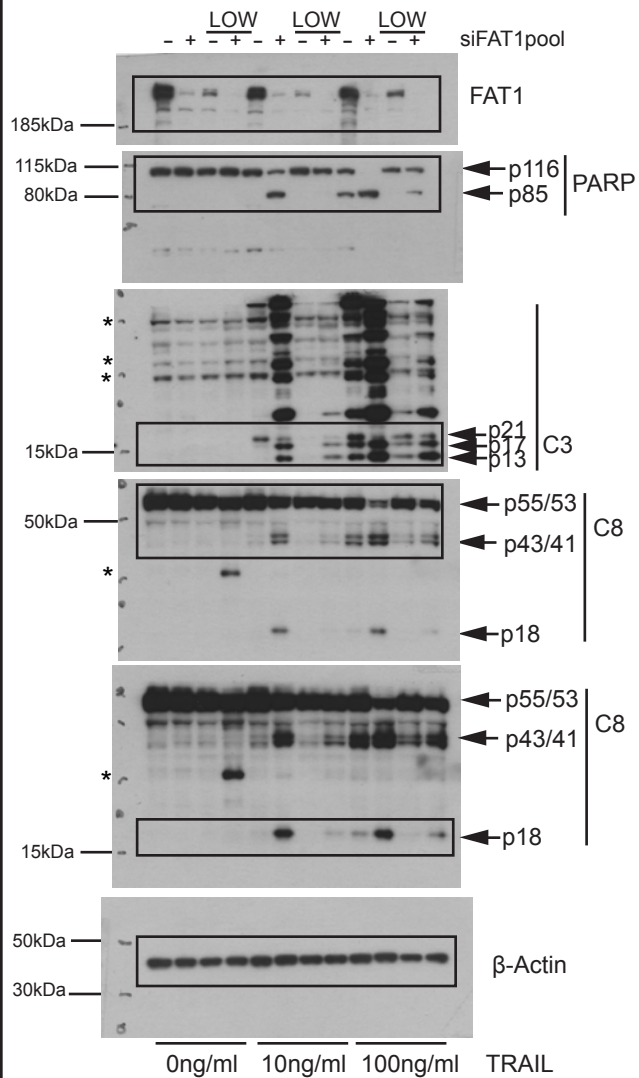

## Figure 6B

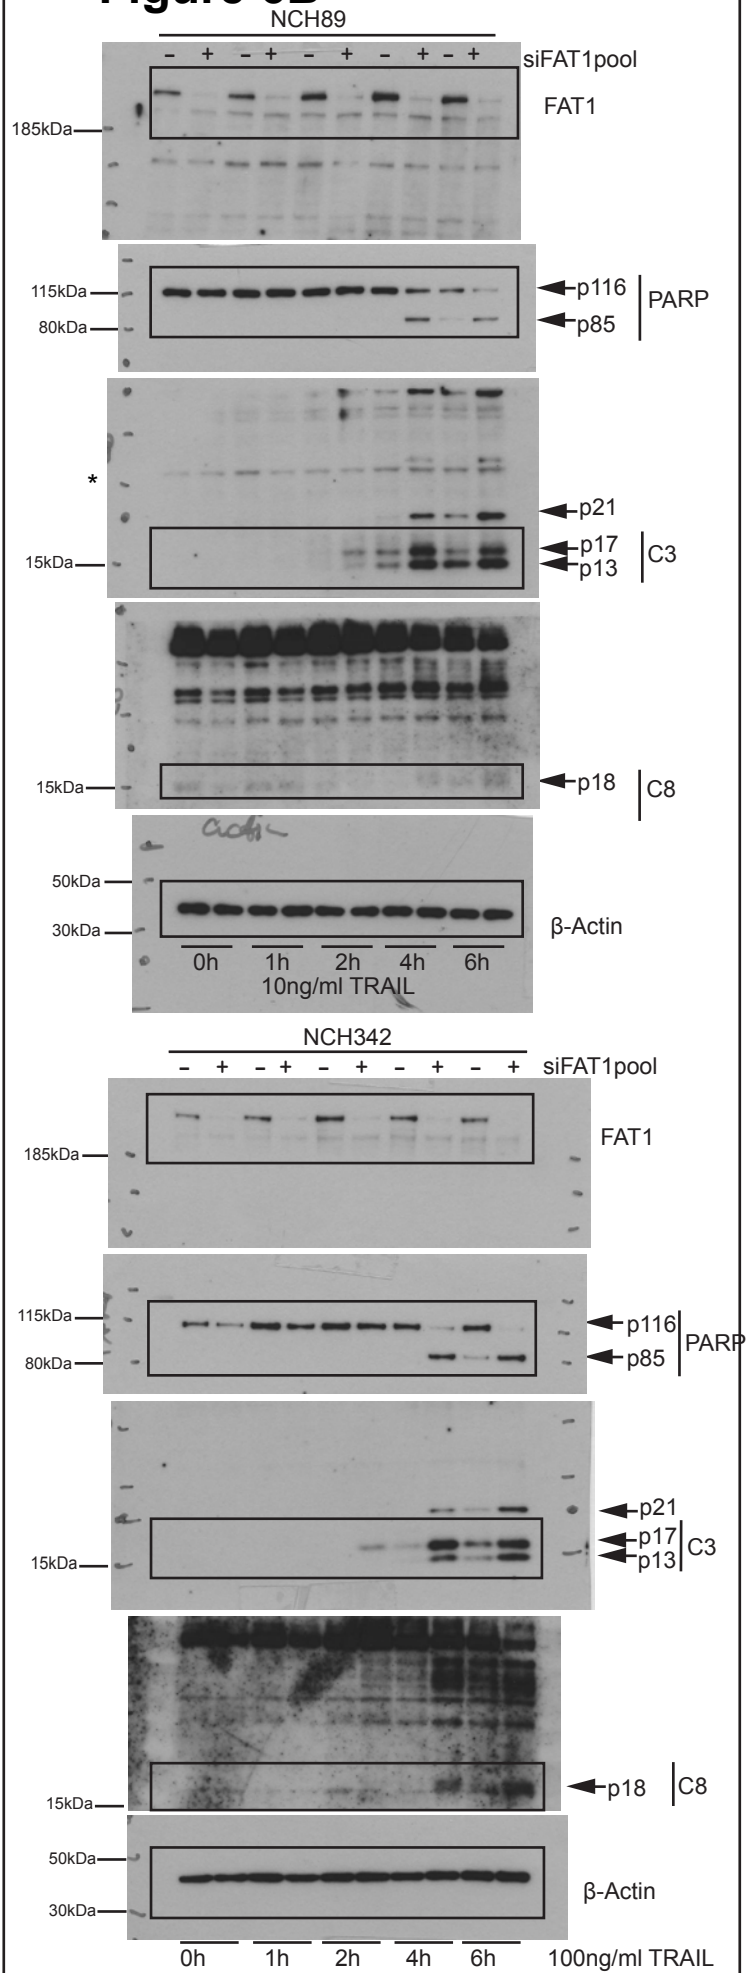

**Figure 6C**

DISC-IP

RLUC

siFAT1

0' 15' 30' 60' 0' 15' 30' 60' min after TRAIL

Input

RLUC

siFAT1

0' 15' 30' 60' 0' 15' 30' 60' min after TRAIL

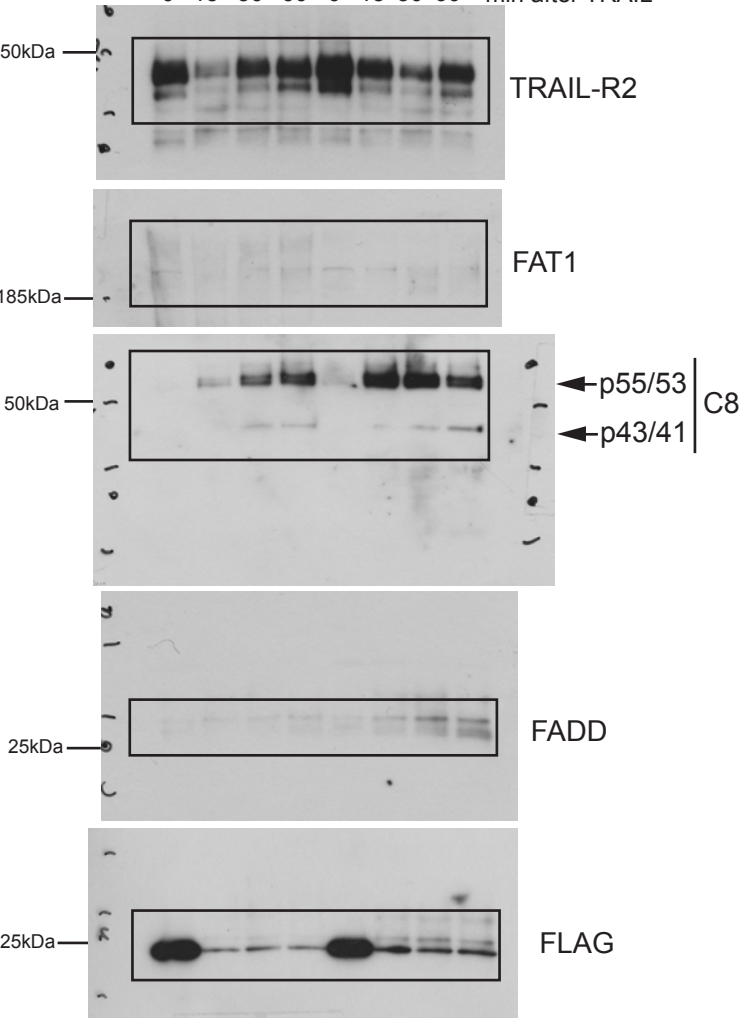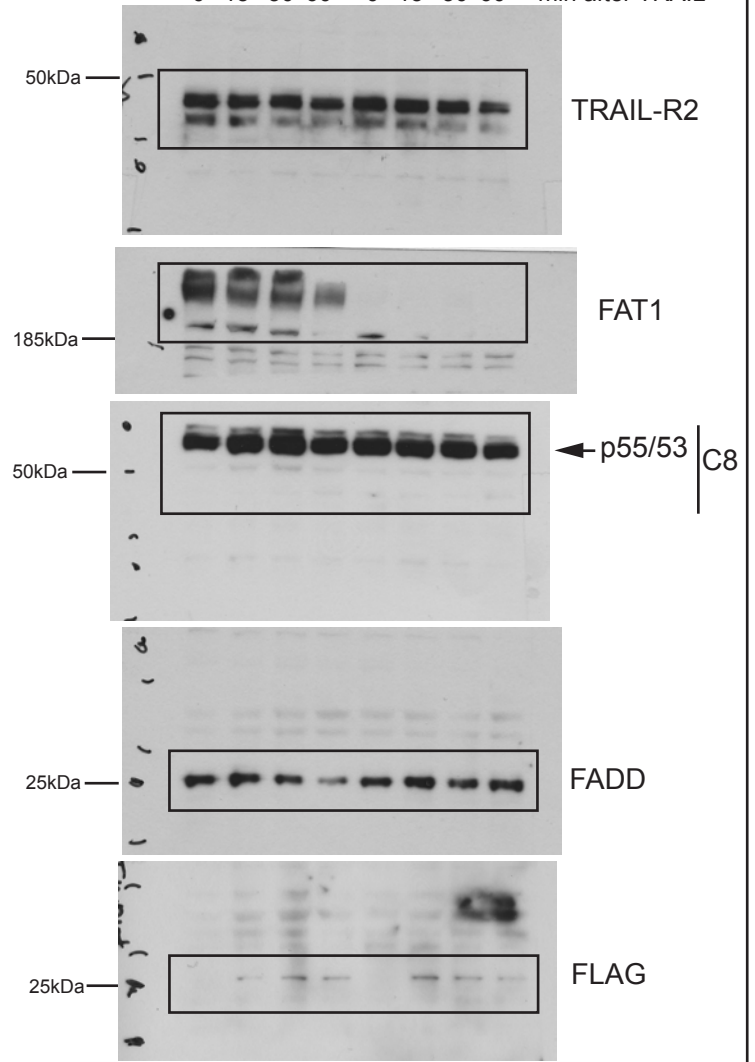

Supplement: embj0033-0181-sd14.pdf [file embj0033-0181-sd14.pdf]
