# Supplementary material
Source: PubMed Central journal article supplement (PMC3989614)

# Supplementary Figure S1

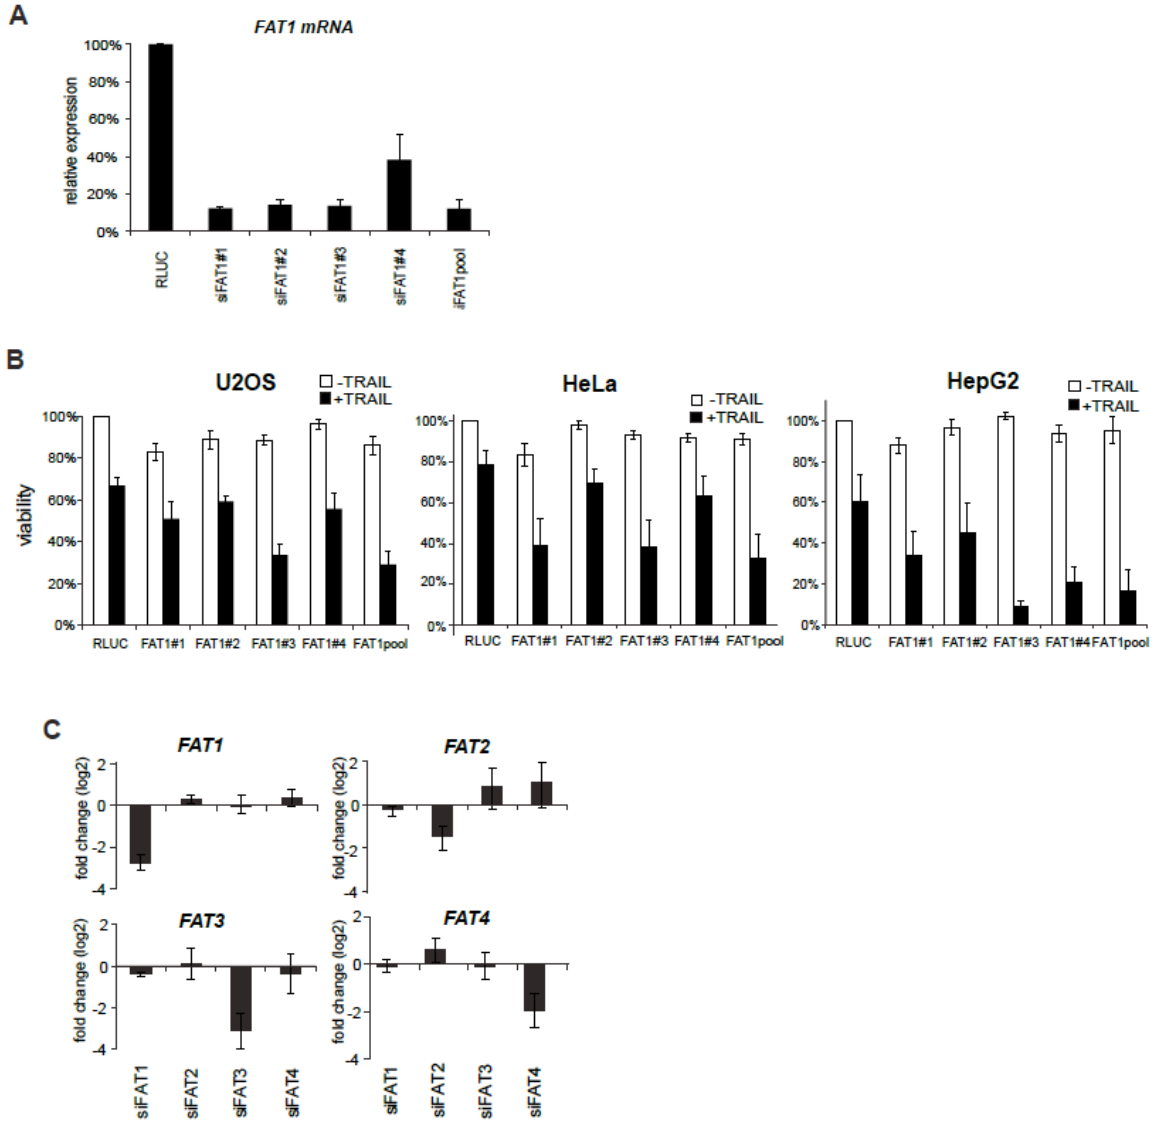

Supplement: embj0033-0181-sd1.pdf [file embj0033-0181-sd1.pdf]

# Source Data Figure 2

## Figure 2B

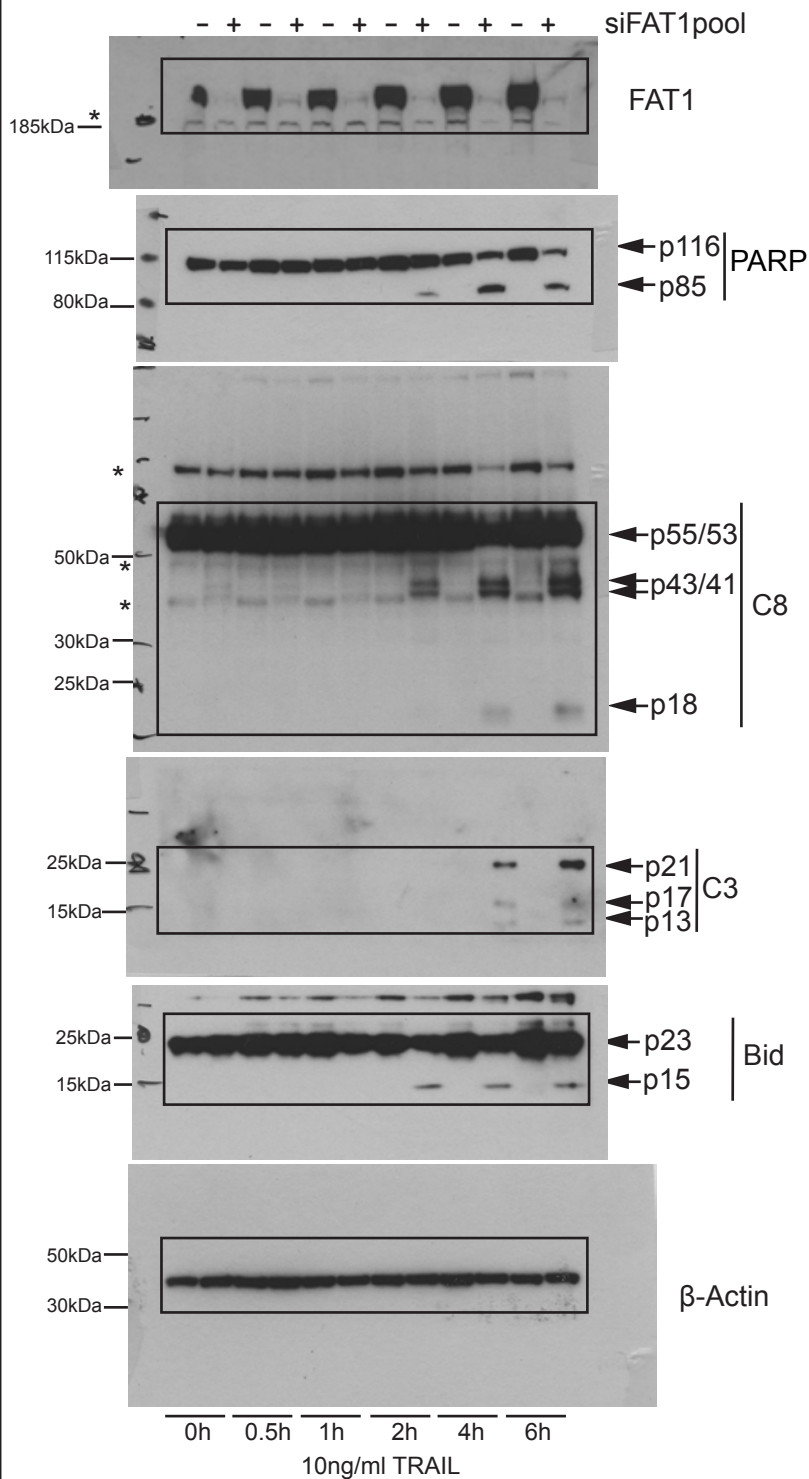

## Figure 2C

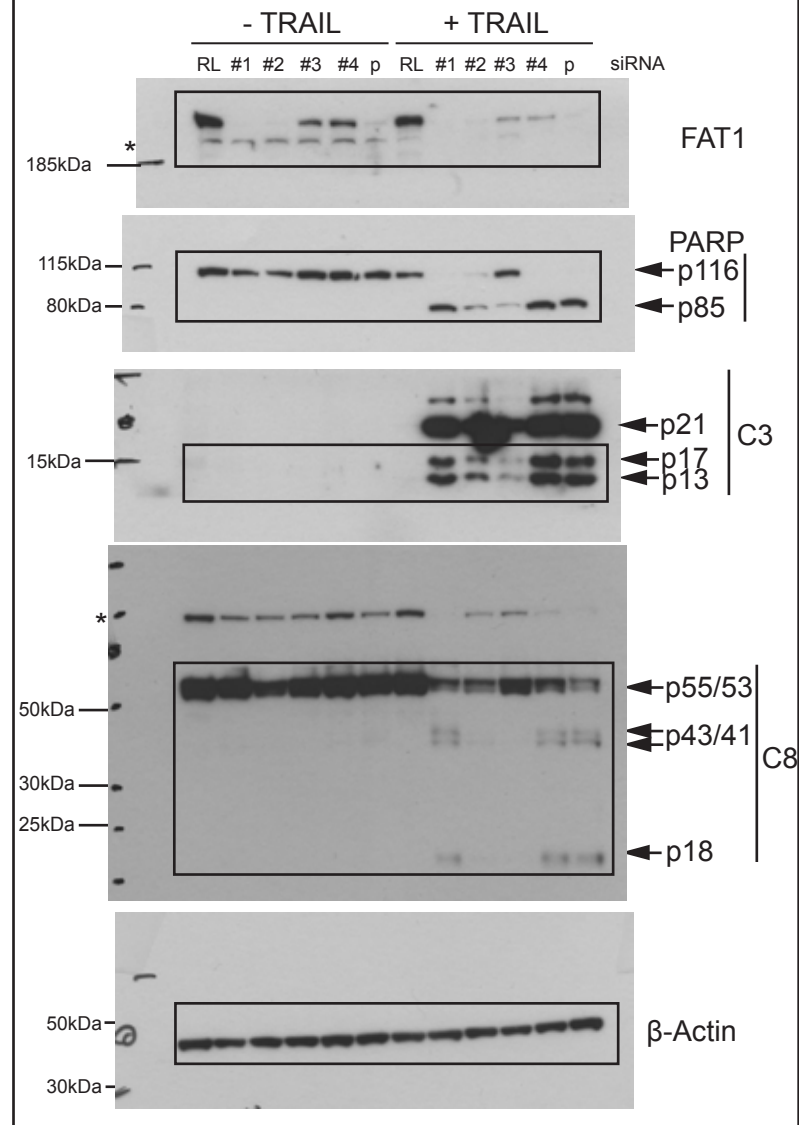

# Figure 2D

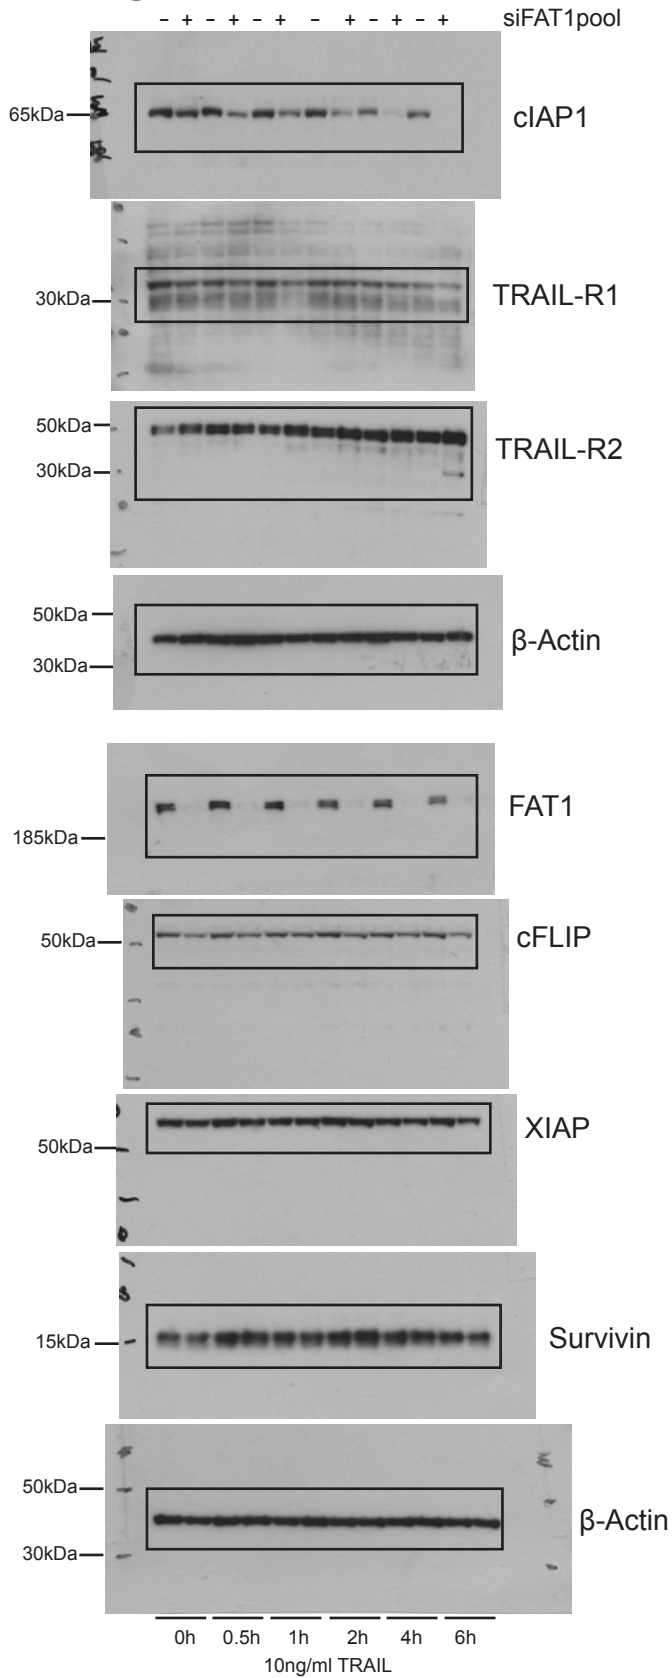

# Figure 2F

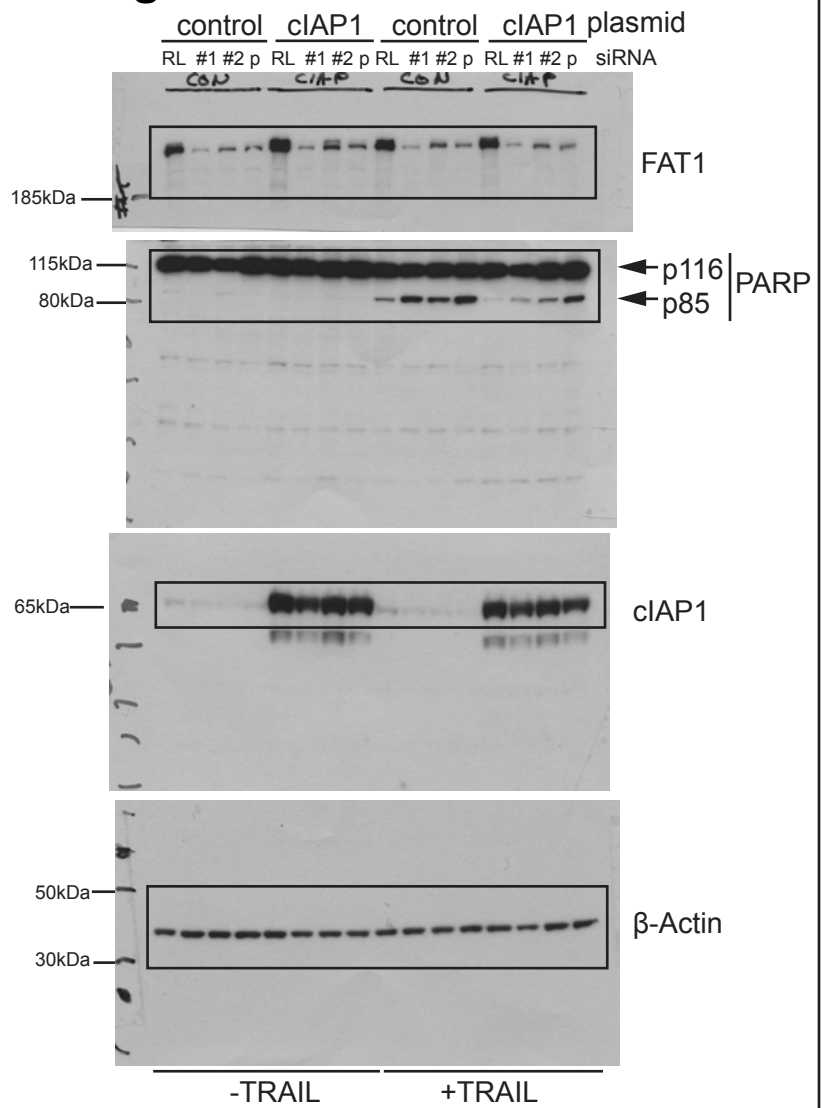

Supplement: embj0033-0181-sd10.pdf [file embj0033-0181-sd10.pdf]

# Source Data Figure 4

## Figure 4A

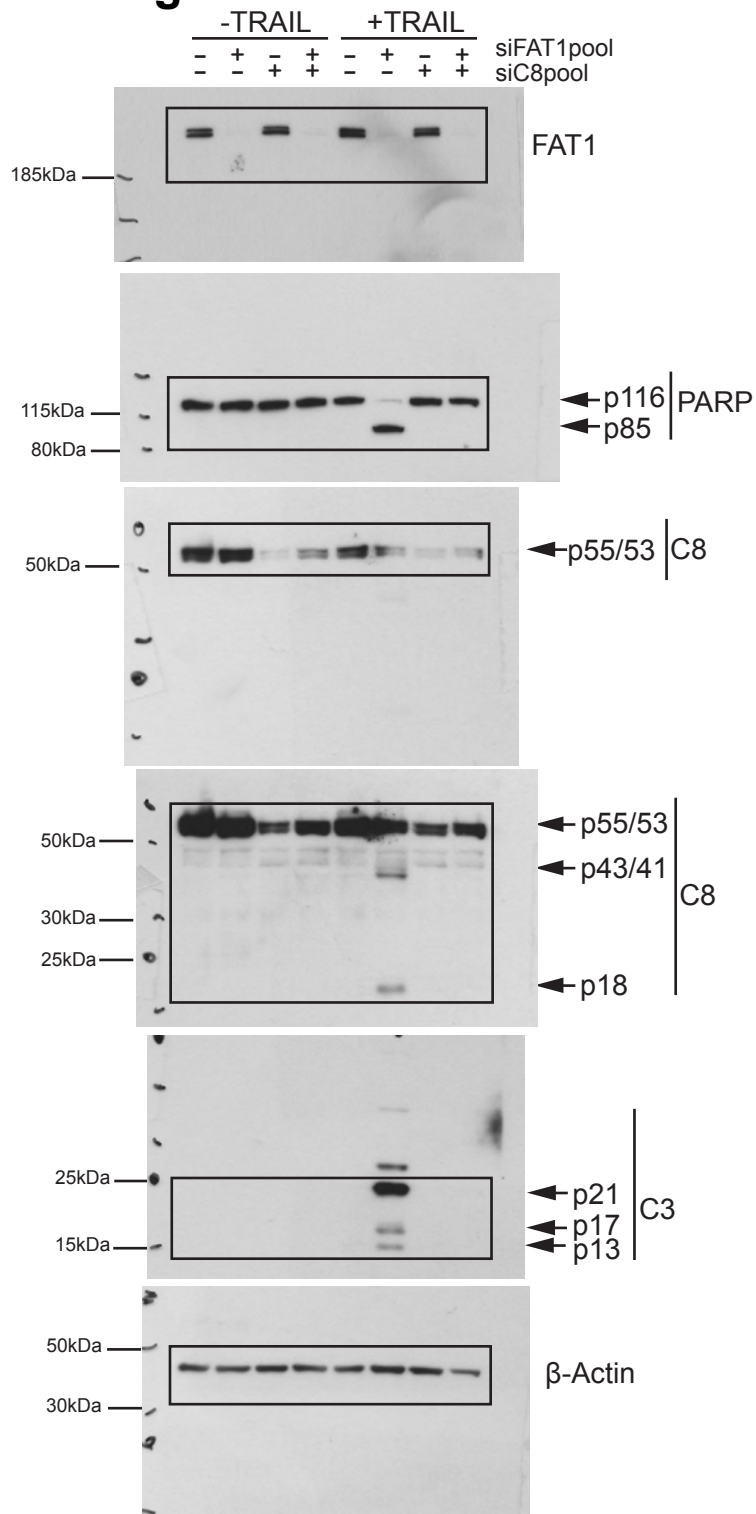

## Figure 4B

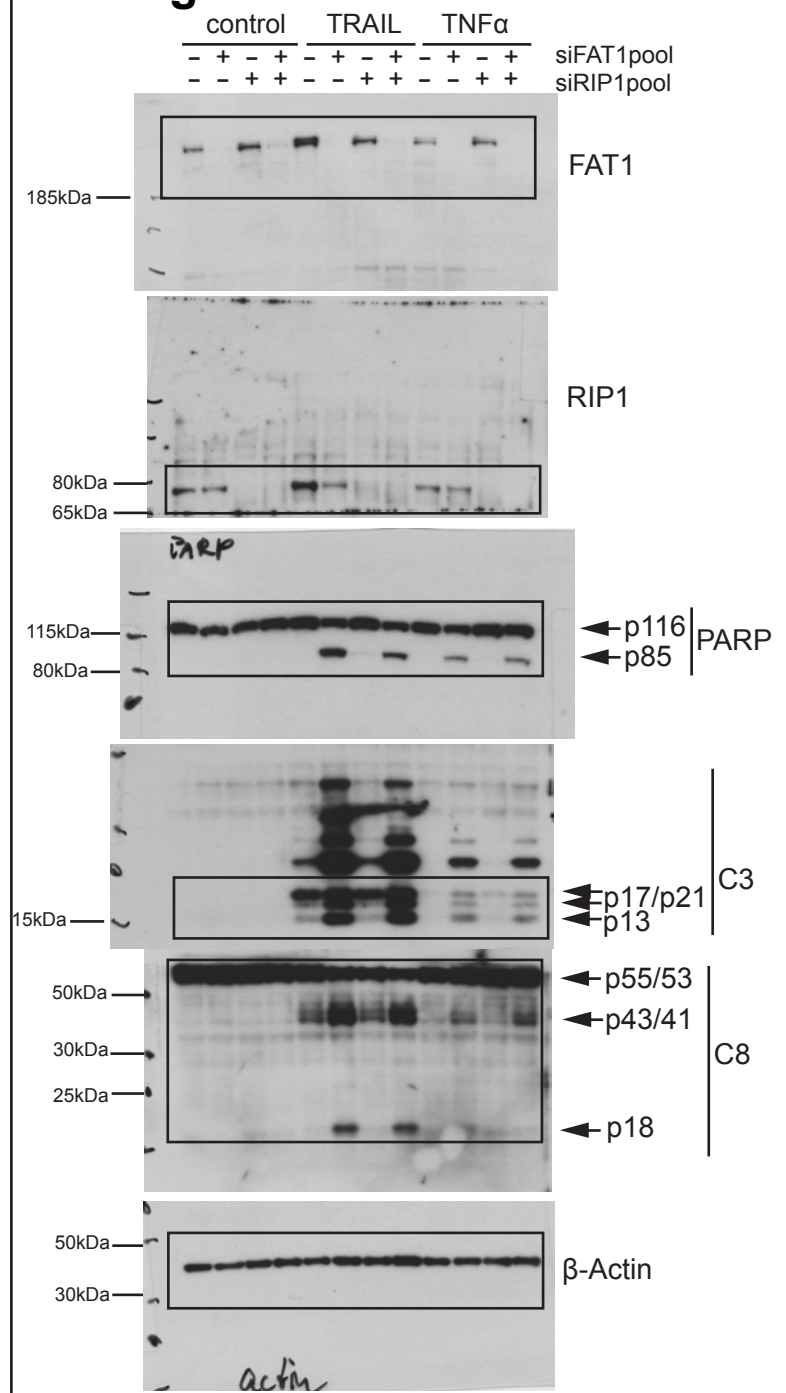

# Figure 4C

DISC-IP

RLUC      siFAT1  
0' 5' 15' 30' 0' 5' 15' 30'

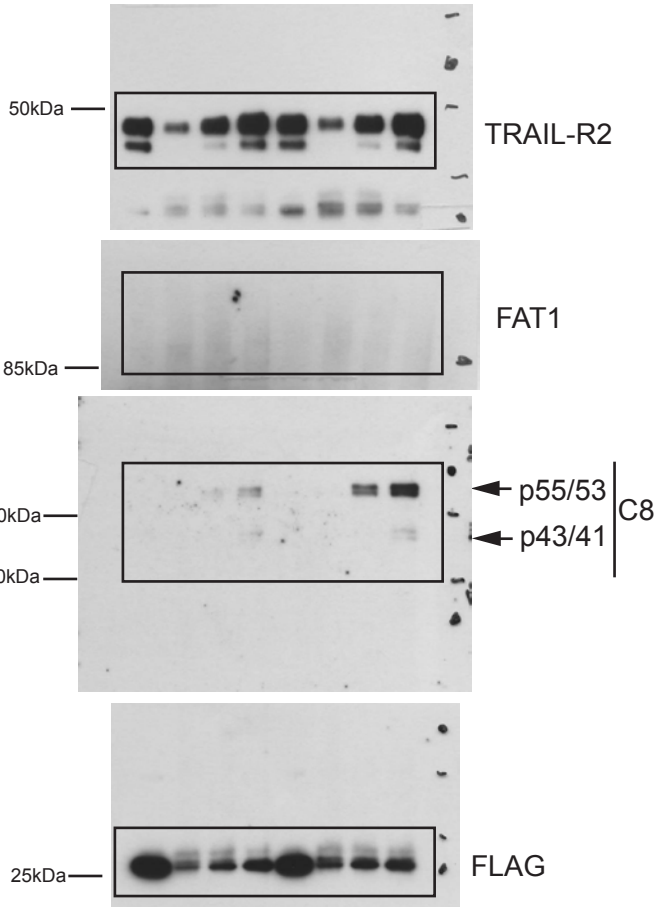

Input

RLUC      siFAT1  
0' 5' 15' 30' 0' 5' 15' 30' min after TRAIL

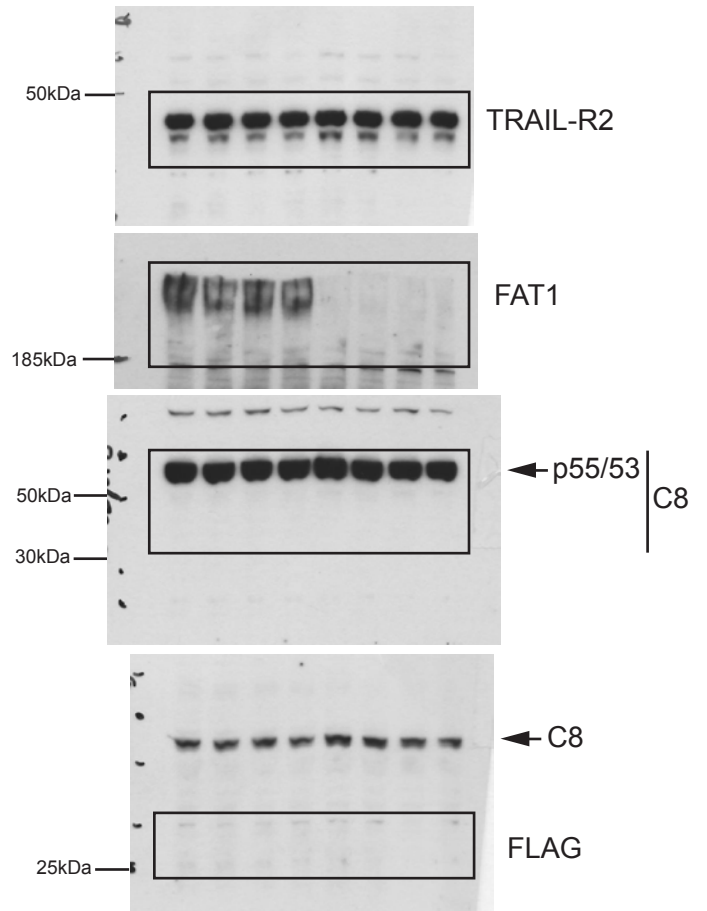

Supplement: embj0033-0181-sd12.pdf [file embj0033-0181-sd12.pdf]

# Source Data Figure 5

## Figure 5A

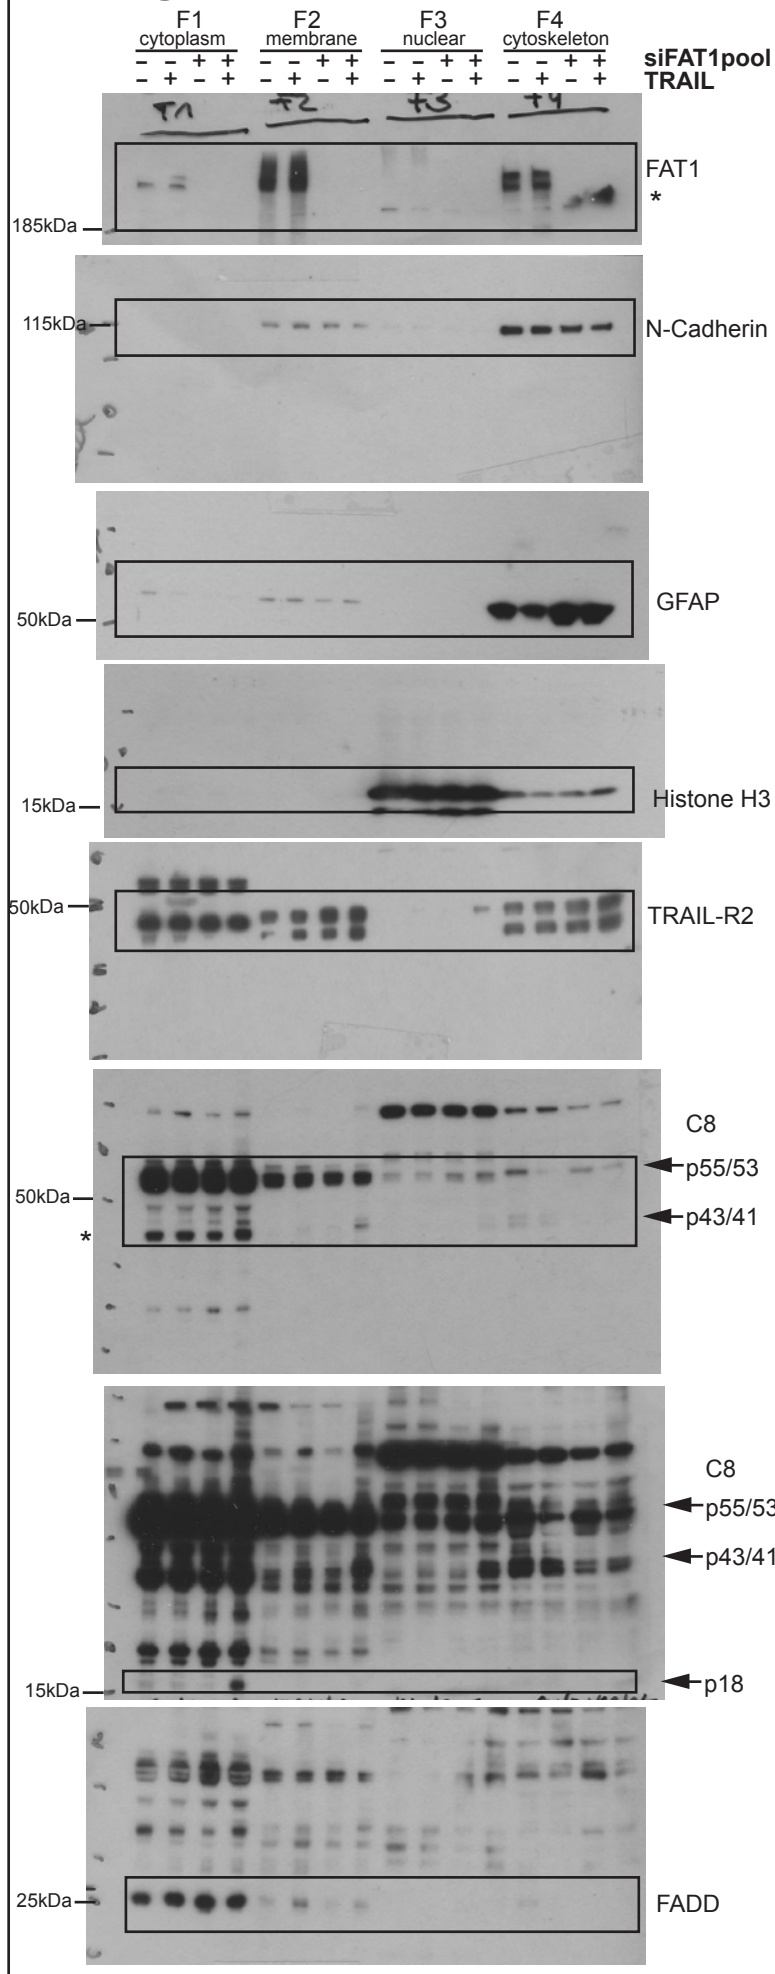

# Figure 5C

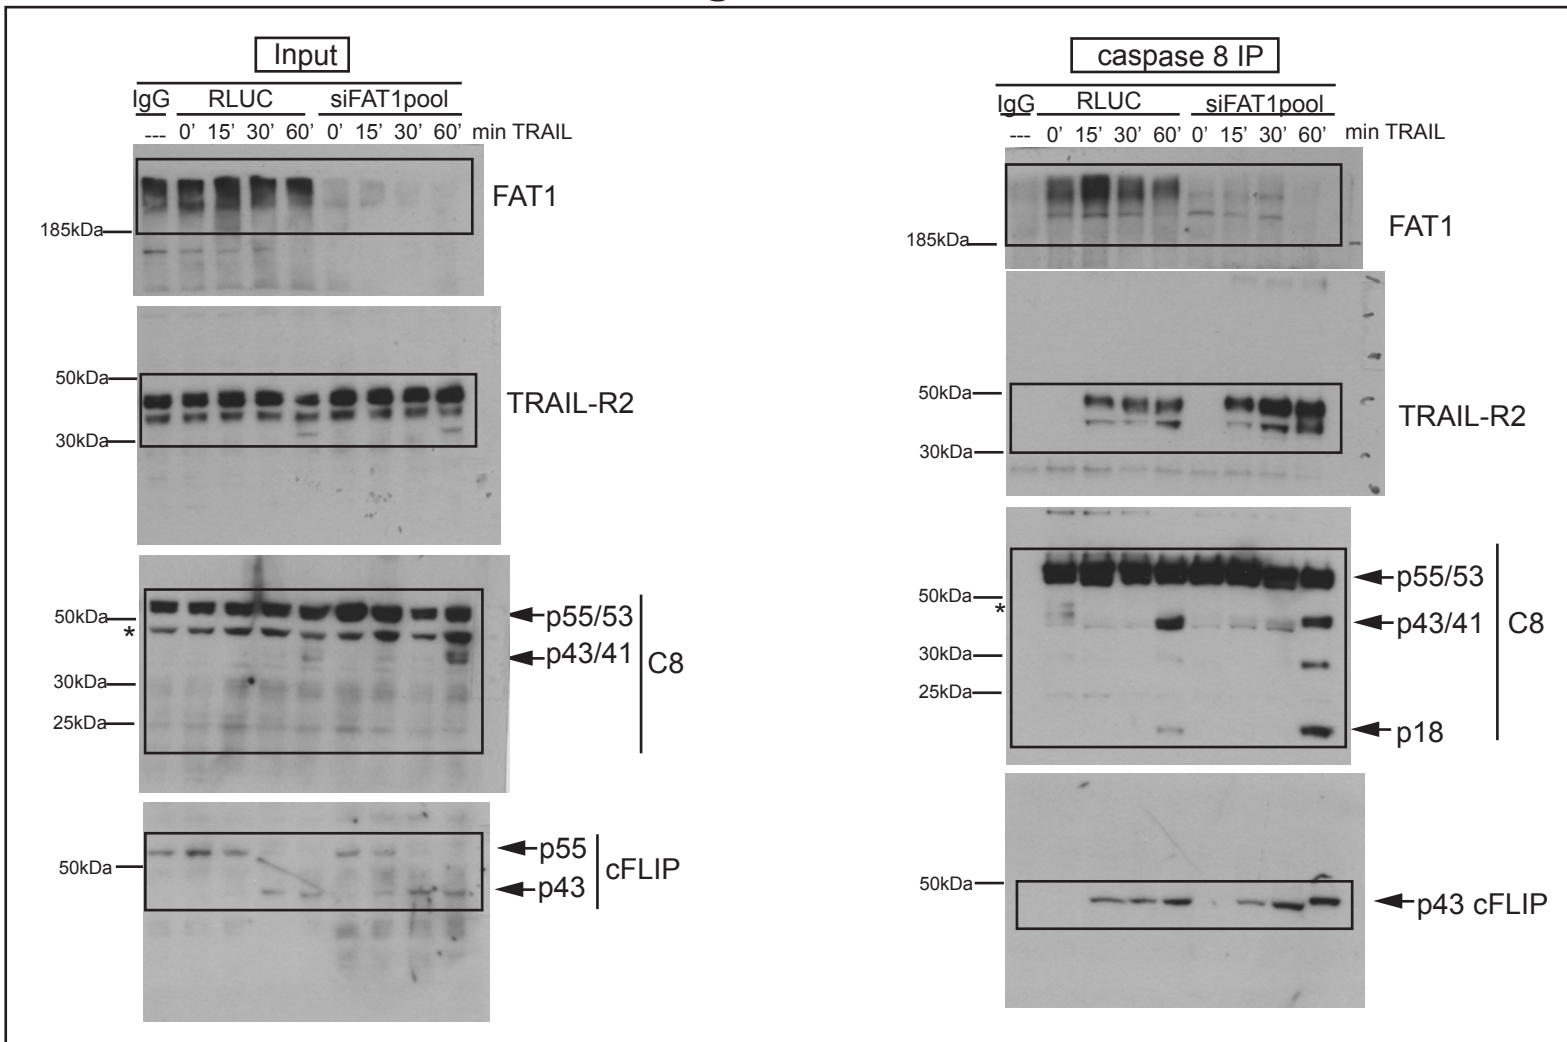

Supplement: embj0033-0181-sd13.pdf [file embj0033-0181-sd13.pdf]

**Figure 7B**

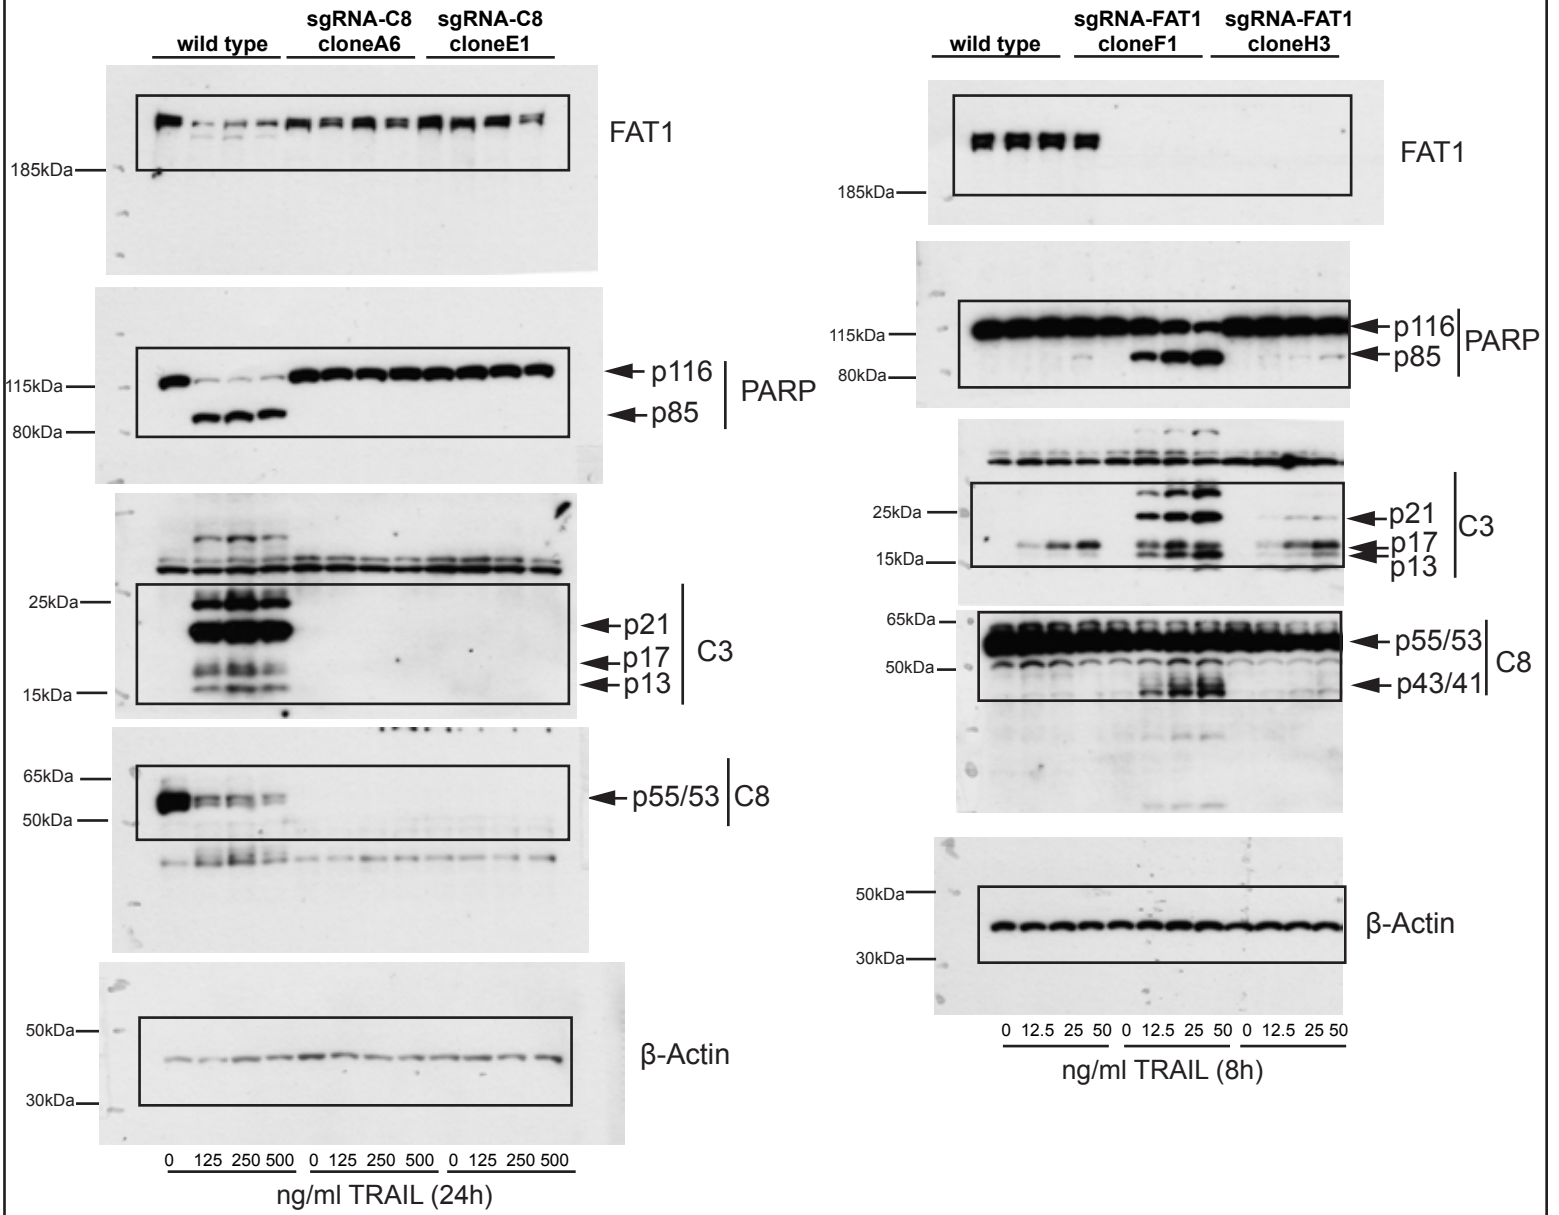

Supplement: embj0033-0181-sd15.pdf [file embj0033-0181-sd15.pdf]
